# Supplementary material
Source: PubMed Central journal article supplement (PMC3092679)
Supplement: epi0603_0307SD1.pdf [file epi0603_0307SD1.pdf]

Supplementary figure 1.

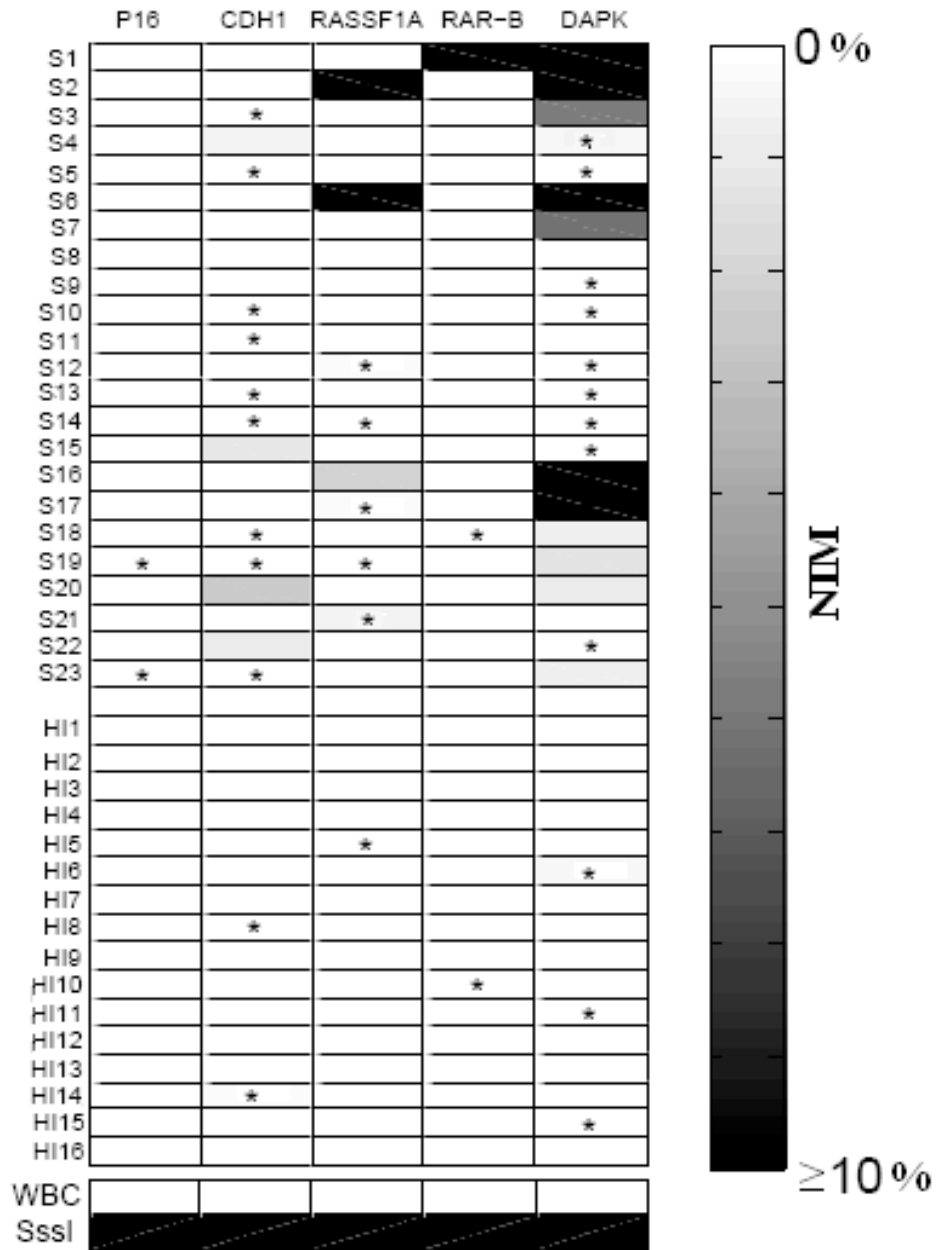

Supplementary table 1. List of primer and probe sequences

| Genes                        | primer sequences                                | Annealing temperature (°C) | Product size (bp) |
|------------------------------|-------------------------------------------------|----------------------------|-------------------|
| (A) primer sequences for MSP |                                                 |                            |                   |
| p16                          | M: sense: TTATTAGAGGGTGGGGCGGATCGC <sup>a</sup> | 65                         | 150               |
|                              | antisense: GACCCCGAACCGCGACCGTAA                |                            |                   |
|                              | U: sense: TTATTAGAGGGTGGGGTGGATTGT              | 60                         | 151               |
|                              | antisense: CAACCCCAAACCACAACCATAA               |                            |                   |
| p14                          | M: sense: GTGTTAAAGGGCGGCGTAGC                  | 60                         | 122               |
|                              | antisense: AAAACCCTCACTCGCGACGA                 |                            |                   |
|                              | U: sense: TTTTGGTGTAAAGGGTGGTG TAGT             | 60                         | 132               |
|                              | antisense: CACAAAAACCCTCACTCACAACAA             |                            |                   |
| APC                          | M: sense: TATTGCGGAGTGCGGGTC                    | 55                         | 98                |
|                              | antisense: TCGACGAACTCCCGACGA                   |                            |                   |
|                              | U: sense:GTGTTTTATTGTGGAGTG TGGGTT              | 60                         | 108               |
|                              | antisense:CCAATCAACAAACTCCCAACAA                |                            |                   |
| MGMT                         | M: sense: TTTGACGTTCTAGGTTTTCGC                 | 59                         | 81                |
|                              | antisense: GCACTCTCCGAAAACGAAACG                |                            |                   |
|                              | U: sense: TTTGTGTTTTGATGTTTGTAGGTTTTTGT         | 59                         | 93                |
|                              | antisense: AACTCCACACTCTCCAAAAACAAAACA          |                            |                   |
| DAPK                         | M: sense: GGATAGTCGGATCGAGTTAACGTC              | 60                         | 98                |
|                              | antisense: CCCTCCAAACGCCGA                      |                            |                   |
|                              | U: sense: GGAGGATAGTTGGATTGAGTTAATGTT           | 60                         | 106               |
|                              | antisense: CAAATCCCTCCCAAACACCAA                |                            |                   |
| RASSF1A                      | M: sense: GTGTTAACGCGTTGCGTATC                  | 60                         | 94                |
|                              | antisense: AACCCCGCGAACTAAAAACGA                |                            |                   |
|                              | U: sense: TTTGGTTGGAGTGTGTTAATGTG               | 60                         | 108               |
|                              | antisense: CAAACCCACAACTAAAAACAA                |                            |                   |
| CDH1                         | M: sense: TTAGGTTAGAGGGTTATCGCGT                | 57                         | 115               |
|                              | antisense: TAACTAAAAATTCACCTACCGAC              |                            |                   |

---

|                                  |                                       |    |     |
|----------------------------------|---------------------------------------|----|-----|
|                                  | U: sense: TAATTTTAGGTTAGAGGGTTATTGT   | 53 | 97  |
|                                  | antisense: CACAACCAATCAACAACACA       |    |     |
| ADAM23 M:                        | sense: GGGCGTACGTTTCGTTTC             | 62 | 117 |
|                                  | antisense: CAACGACTACGAAAACCTACCG     |    |     |
|                                  | U: sense: GGGGTGGGGTGTATGTTT          | 62 | 135 |
|                                  | antisense: ACACAACCACTTCAACAACCTACA   |    |     |
| RAR-β M:                         | sense: TCGAGAACGCGAGCGATTTCG          | 60 | 146 |
|                                  | antisense: GACCAATCCAACCGAAACGA       |    |     |
|                                  | U: sense: TTGAGAATGTGAGTGATTGA        | 60 | 146 |
|                                  | antisense: AACCAATCCAACCAAAAACAA      |    |     |
| TIMP-3 M:                        | sense: CGTTTCGTTATTTTTTGTTCGTTTC      | 59 | 116 |
|                                  | antisense: CCGAAAACCCCGCCTCG          |    |     |
|                                  | U: sense: TTTTGTTCGTTATTTTTTGTTCGTTTC | 59 | 122 |
|                                  | antisense: CCCCCAAAACCCACCTCA         |    |     |
| GSTP1 M:                         | sense: TTCGGGGTGTAGCGGTCGTC           | 59 | 91  |
|                                  | antisense: GCCCAATACTAAATCACGACG      |    |     |
|                                  | U: sense: GATGTTGGGGTGTAGTGTTGTT      | 59 | 97  |
|                                  | antisense: CCACCCAATACTAAATCACAACA    |    |     |
| FHIT M:                          | sense: TTGGGGCGCGGGTTTGGGTTTTTACGC    | 66 | 74  |
|                                  | antisense: CGTAAACGACCCGACCCCACTA     |    |     |
|                                  | U: sense: TTGGGGTGTGGGTTTGGGTTTTTATG  | 66 | 74  |
|                                  | antisense: CATAAACAACACCAACCCCACTA    |    |     |
| (B) primer sequences for qRT-PCR |                                       |    |     |
| ACTB                             | sense: TCGTGCGTGACATTAAGGAG           | 65 | 106 |
|                                  | antisense: GGCAGCTCGTAGCTCTTCTC       |    |     |
| DNMT1                            | sense: TACCTGGACGACCCTGACCTC          | 65 | 103 |
|                                  | antisense: CGTTGGCATCAAAGATGGACA      |    |     |
| DNMT3a                           | sense: TATTGATGAGCGCACAAAGAGAGC       | 65 | 111 |

---

---

|                                               |                                                 |    |     |
|-----------------------------------------------|-------------------------------------------------|----|-----|
|                                               | antisense: GGGTGTCCAGGGTAACATTGAG               |    |     |
| DNMT3b                                        | sense: GGCAAGTTCTCCGAGGTCTCTG                   | 65 | 113 |
|                                               | antisense: TGGTACATGGCTTTTCGATAGGA              |    |     |
| (C) primer and probe sequences for MethyLight |                                                 |    |     |
| ACTB                                          | sense: TGGTGATGGAGGAGGTTTAGTAAGT                | 60 | 133 |
|                                               | antisense: AACCAATAAAACCTACTCCTCCCTTAA          |    |     |
|                                               | probe: FAM-ACCACCACCCAACACACAATAACAAACACA-TAMRA |    |     |
| DAPK                                          | sense: GGATAGTCGGATCGAGTTAACGTC                 | 60 | 98  |
|                                               | antisense: CCCTCCCAAACGCCGA                     |    |     |
|                                               | probe: FAM-ACCCTACCGCTACGAATTACCGAATCCCCT-TAMRA |    |     |
| p16                                           | sense: TGGAGTTTTCGGTTGATTGGTT                   | 60 | 70  |
|                                               | antisense: AACAACGCCCGCACCTCCT                  |    |     |
|                                               | probe: FAM-ACCCGACCCCGAACCGCG-TAMRA             |    |     |
| RASSF1A                                       | sense: GCGTTGAAGTCGGGGTTC                       | 60 | 75  |
|                                               | antisense: CCCGTACTTCGCTAACTTTAAACG             |    |     |
|                                               | probe: FAM-ACAAACGCGAACCGAACGAAACCA-TAMRA       |    |     |
| RAR-β                                         | sense: GGGATTAGAATTTTTTATGCGAGTTGTTGT           | 60 | 93  |
|                                               | antisense: TACCCCGACGATACCCAAAC                 |    |     |
|                                               | probe: FAM-CGAATCGCTCGCGTTCTCGACA-TAMRA         |    |     |
| CDH1                                          | sense: AATTTTAGGTTAGAGGGTTATCGCGT               | 60 | 70  |
|                                               | antisense: TCCCCAAAACGAAACTAACGAC               |    |     |
|                                               | probe: FAM-CGCCCACCCGACCTCGCAT-TAMRA            |    |     |

---

qRT-PCR, quantitative reverse transcription-PCR; M, methylated- specific primers; U, unmethylated-specific primers.

Supplementary table 2. Correlation between serum DNA hypermethylation and clinico-pathological parameters of ESCC patients (n=45)

|                    |                 | Frequency of methylation (%) |         |       |              |       |                |
|--------------------|-----------------|------------------------------|---------|-------|--------------|-------|----------------|
|                    |                 | p16                          | RASSF1A | DAPK  | RAR- $\beta$ | CDH1  | $\geq 2$ genes |
| Gender             |                 |                              |         |       |              |       |                |
|                    | Male            | 8.3                          | 63.9    | 72.2  | 19.4         | 83.3  | 80.6           |
|                    | Female          | 0.0                          | 55.6    | 77.8  | 55.6         | 88.9  | 88.9           |
|                    | <i>P</i> -value | 1                            | 0.711   | 1     | 0.043        | 1     | 1              |
| Age group (year)   |                 |                              |         |       |              |       |                |
|                    | <60             | 12.5                         | 75.0    | 75.0  | 29.2         | 87.5  | 87.5           |
|                    | $\geq 60$       | 0.0                          | 47.6    | 71.4  | 23.8         | 81.0  | 76.2           |
|                    | <i>P</i> -value | 0.236                        | 0.073   | 1     | 0.746        | 0.689 | 0.443          |
| Size (cm)*         |                 |                              |         |       |              |       |                |
|                    | <5              | 4.3                          | 65.2    | 65.2  | 34.8         | 78.3  | 78.3           |
|                    | $\geq 5$        | 9.5                          | 57.1    | 85.7  | 19.0         | 90.5  | 85.7           |
|                    | <i>P</i> -value | 0.599                        | 0.758   | 0.169 | 0.318        | 0.416 | 0.701          |
| Location of tumor* |                 |                              |         |       |              |       |                |
|                    | Upper           | 0.0                          | 40.0    | 100.0 | 40.0         | 80.0  | 80.0           |
|                    | Middle          | 8.3                          | 62.5    | 66.7  | 29.2         | 79.2  | 79.2           |
|                    | Lower           | 6.7                          | 66.7    | 80.0  | 20.0         | 93.3  | 86.7           |
|                    | <i>P</i> -value | 1                            | 0.617   | 0.327 | 0.626        | 0.492 | 0.864          |
| Differentiation *  |                 |                              |         |       |              |       |                |
|                    | Poorly          | 11.8                         | 58.8    | 70.6  | 41.2         | 88.2  | 82.4           |
|                    | Moderately      | 5.0                          | 60.0    | 85.0  | 20.0         | 80.0  | 80.0           |
|                    | Well            | 0.0                          | 71.4    | 57.1  | 14.3         | 85.7  | 85.7           |
|                    | <i>P</i> -value | 0.756                        | 0.844   | 0.331 | 0.341        | 0.858 | 1              |
| pT category *      |                 |                              |         |       |              |       |                |
|                    | 1-2             | 9.1                          | 63.6    | 45.5  | 27.3         | 63.6  | 54.5           |
|                    | 3-4             | 6.1                          | 60.6    | 84.8  | 27.3         | 90.9  | 90.9           |
|                    | <i>P</i> -value | 1                            | 1       | 0.016 | 1            | 0.054 | 0.016          |
| pN category *      |                 |                              |         |       |              |       |                |
|                    | 0               | 9.1                          | 54.5    | 68.2  | 22.7         | 86.4  | 81.8           |
|                    | 1-2             | 4.5                          | 68.2    | 81.8  | 31.8         | 81.8  | 81.8           |
|                    | <i>P</i> -value | 1                            | 0.537   | 0.488 | 0.736        | 1     | 1              |
| Smoking*           |                 |                              |         |       |              |       |                |
|                    | Smoker          | 9.4                          | 62.5    | 75.0  | 21.9         | 81.3  | 78.1           |
|                    | Non-smoker      | 0.0                          | 58.3    | 75.0  | 41.7         | 91.7  | 91.7           |
|                    | <i>P</i> -value | 0.551                        | 1       | 1     | 0.259        | 0.653 | 0.413          |
| Alcohol *          |                 |                              |         |       |              |       |                |
|                    | Drinker         | 10.7                         | 60.7    | 82.1  | 28.6         | 89.3  | 82.1           |

|                 |      |      |       |      |       |      |
|-----------------|------|------|-------|------|-------|------|
| Non-drinker     | 0.0  | 62.5 | 62.5  | 25.0 | 75.0  | 81.3 |
| <i>P</i> -value | 0.29 | 1    | 0.169 | 1    | 0.236 | 1    |

\*, Clinical data was not available for one patient.

**Supplementary Table 3.** Diagnostic information of serum DNA methylation at 5 genes in another serum sample validation set

| <i>Gene</i>     | <i>AUC (95%, CI)</i> | <i>Sensitivity (%)</i> | <b>Specificity (%)</b> |
|-----------------|----------------------|------------------------|------------------------|
| p16             | 0.544(0.485-0.602)   | 8.7                    | 100                    |
| DAPK            | 0.841(0.720-0.962)   | 87.0                   | 81.3                   |
| RAR-β           | 0.512(0.427-0.597)   | 8.7                    | 93.8                   |
| CDH1            | 0.720(0.587-0.853)   | 56.5                   | 87.5                   |
| RASSF1A         | 0.643(0.526-0.760)   | 34.8                   | 93.8                   |
| Any gene        | 0.760(0.627-0.892)   | 95.7                   | 56.3                   |
| 2 or more genes | 0.891(0.805-0.978)   | 78.3                   | 100.0                  |

CI, confidence interval.
